# Supplementary material
Source: PubMed Central journal article supplement (PMC5540029)
Supplement: jamadermatol-153-544-s001.pdf [file jamadermatol-153-544-s001.pdf]

## Supplementary Online Content

Carrera C, Segura S, Aguilera P, et al. Dermoscopic clues for diagnosing melanomas resembling seborrheic keratosis. *JAMA Dermatol*. Published online March 29, 2017. doi:10.1001/jamadermatol.2017.0129

**eTable 1.** Demographics and Characteristics of Melanomas Resembling Seborrheic Keratosis

**eTable 2.** Total Dermoscopy Score (TDS) and 7-Point Checklist Score for the Whole Series and Specifically for Those 24 Cases Considered as SKs also by Dermoscopy (Referred as Dermoscopically SK-like MMs)

This supplementary material has been provided by the authors to give readers additional information about their work.

**eTable 1.** Demographics and Characteristics of Melanomas Resembling Seborrheic Keratosis.

| PATIENTS' CHARACTERISTICS        |                        | Total (No 134) | Male No. 73 (54.4%) | Female No. 61 (45.6%) | Significance   |
|----------------------------------|------------------------|----------------|---------------------|-----------------------|----------------|
| Age (range 20-84)                | Mean (SD) years        | 55.63 (17.5)   | 58.35 (16.4)        | 52.33 (18.3)          | P=0.06         |
| Previous history of MM           | No No.(%)              | 118 (93.7)     | 63 (91.3)           | 55 (96.5)             | NS             |
|                                  | Yes No.(%)             | 8 (6.3)        | 6 (8.7)             | 2 (3.5)               | NS             |
| Familial history of MM           | No No.(%)              | 51 (89.5)      | 34 (87.2)           | 17 (94.4)             | NS             |
|                                  | Yes No.(%)             | 6 (10.5)       | 5(12.8)             | 1 (5.6)               |                |
| Localization                     | Anterior trunk No.(%)  | 11 (8.3)       | 6 (8.3)             | 5 (8.2)               | NS             |
|                                  | Posterior trunk No.(%) | 52 (39.1)      | <b>34 (47.2)</b>    | 18 (29.5)             | P<0.04 OR 0.5  |
|                                  | Limbs No.(%)           | 47 (35.6)      | 18 (25.0)           | <b>29 (48.3)</b>      | P=0.005 OR 2.8 |
|                                  | Face No.(%)            | 17 (12.8)      | 9 (12.5)            | 8 (13.1)              | NS             |
|                                  | Head/neck No.(%)       | 6 (4.5)        | 5 (6.9)             | 1 (1.6)               | NS             |
| Presence of Seborrheic Keratosis | Few SK No.(%)          | 30 (23.4)      | 16 (23.2)           | 14 (23.7)             | NS             |
|                                  | Multiple SK No.(%)     | 41 (32.0)      | 27 (39.1)           | 14 (23.7)             | P=0.06 OR 0.84 |
|                                  | NONE SK No.(%)         | 57 (44.5)      | 26 (37.7)           | 31 (52.5)             | P=0.09 OR 1.8  |
| TUMORS' CHARACTERISTICS          |                        | TOTAL 134      | Male                | Female                | Significance   |
| Melanoma STAGE                   | IN SITU No.(%)         | 22 (17.5)      | 10 (14.5)           | 12 (21.1)             | NS             |
|                                  | INVASIVE No.(%)        | 104 (82.5)     | 59 (85.5)           | 45 (78.9)             | NS             |
| Histological MM SUBTYPE          | SSMM No.(%)            | 98 (75.4)      | 54 (76.1)           | 44 (74.6)             | NS             |
|                                  | LMM No.(%)             | 20 (15.4)      | 10 (14.1)           | 10 (16.9)             | NS             |
|                                  | NODULAR MM No.(%)      | 9 (6.9)        | 7 (9.9)             | 2 (3.4)               | NS             |

|                                      |            |                  |             |               |                     |
|--------------------------------------|------------|------------------|-------------|---------------|---------------------|
| ULCERATION                           | NO No.(%)  | 97 (82.9)        | 52 (82.5)   | 45 (83.3)     | NS                  |
|                                      | YES No.(%) | 20 (17.1)        | 11 (17.5)   | 9 (16.7)      | NS                  |
| <b>TUMORS' CHARACTERISTICS</b>       |            | <b>TOTAL 134</b> | <b>Male</b> | <b>Female</b> | <b>Significance</b> |
| FOLLICULOTROPISM                     | NO No.(%)  | 91 (81.3)        | 50 (80.6)   | 41 (82)       | NS                  |
|                                      | YES No.(%) | 21 (18.8)        | 12 (19.4)   | 9 (18)        | NS                  |
| NEVUS ASSOCIATED<br>MM               | NO No.(%)  | 60 (75.9)        | 36 (73.5)   | 24 (80)       | NS                  |
|                                      | YES No.(%) | 19 (24.1)        | 13 (26.5)   | 6 (20)        | NS                  |
| Scaled diameter (mm)<br>(41 tumors)  | Mean (SD)  | 10.75 (4.2)      | 10.82 (4.2) | 10.66 (4.2)   | NS                  |
| Breslow index (mm) (104<br>invasive) | Mean (SD)  | 1.53 (1.4)       | 1.45 (1.2)  | 1.64 (1.7)    | NS                  |

**eTable 2.** Total Dermoscopy Score (TDS) and 7-Point Checklist Score for the Whole Series and Specifically for Those 24 Cases Considered as SKs Also by Dermoscopy (Referred as Dermoscopically SK-like MMs).

|                                             | <b>Total SK-like MMs<br/>(No. 134): Mean<br/>(SD)</b> | <b>Dermoscopically SK<br/>like MMs (No. 24):<br/>Mean (SD)</b> | <b>Statistical<br/>Significance*</b> |
|---------------------------------------------|-------------------------------------------------------|----------------------------------------------------------------|--------------------------------------|
| <b>TDS (ABCD dermoscopic<br/>algorithm)</b> | 4.71 (1.6)                                            | 4.22 (1.3)                                                     | p=0.07                               |
| <b>7 point checklist</b>                    | <b>4.37 (2.3)</b>                                     | <b>1.96 (1.9)</b>                                              | <b>p&lt;0.001</b>                    |

\* Significant difference on tStudent comparison of dermoscopic scores between dermoscopically SK-like MMs (No.=24) and those correctly detected (No.=110).
